# Supplementary material for: The urokinase plasminogen activation system in gastroesophageal cancer: A systematic review and meta-analysis
Source: PubMed Central journal article supplement (PMC5410288; doi:10.18632/oncotarget.15485), 2017-02-18
Supplement: oncotarget-08-23099-s001.pdf [file oncotarget-08-23099-s001.pdf]

# The urokinase plasminogen activation system in gastroesophageal cancer: A systematic review and meta-analysis

## Supplementary Materials

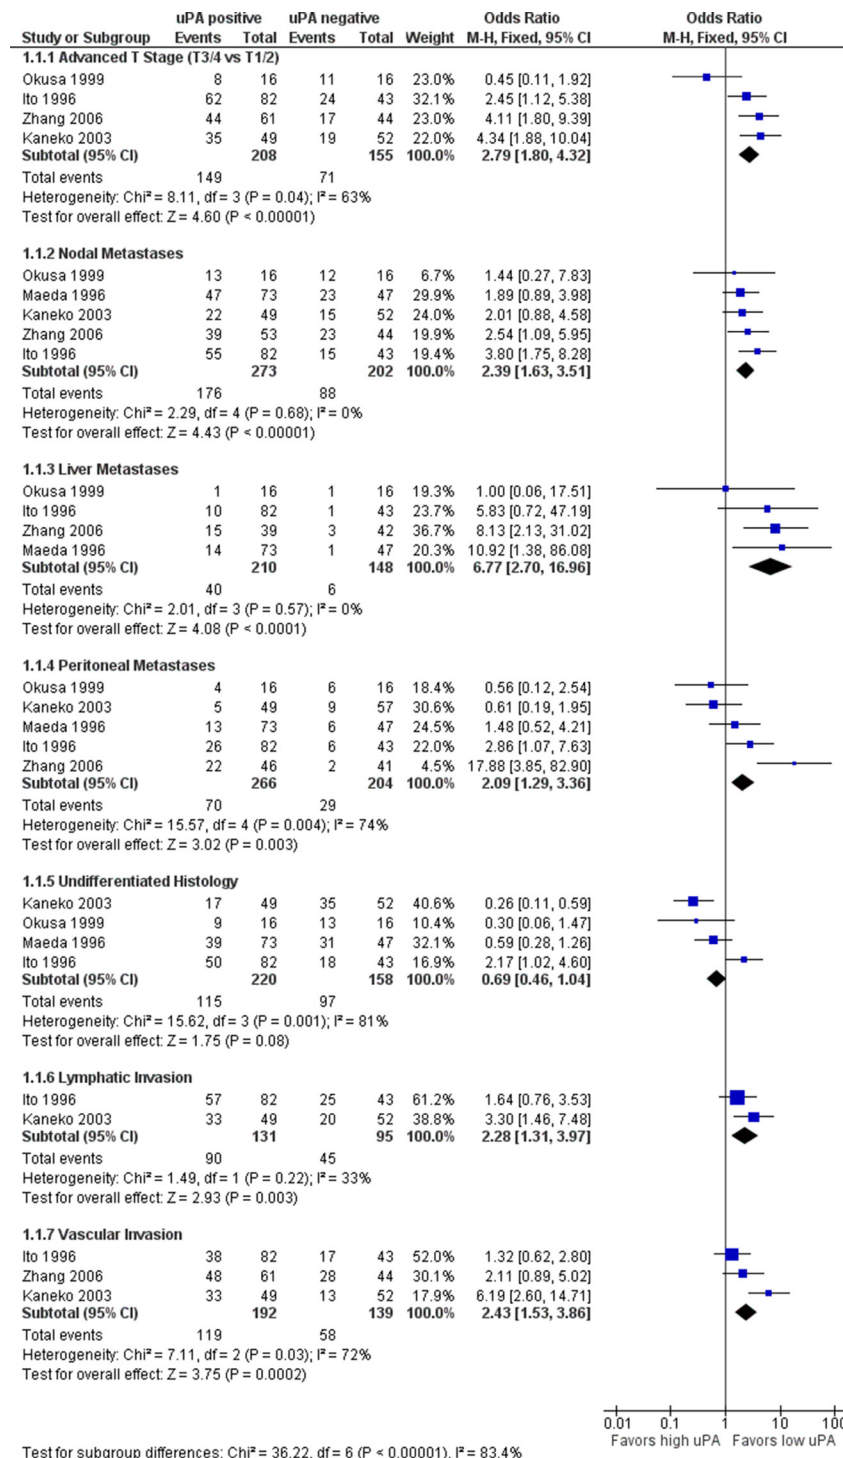

Supplementary Figure 1: Pooled estimate of odds ratio (OR) for uPA expression and clinicopathological factors.

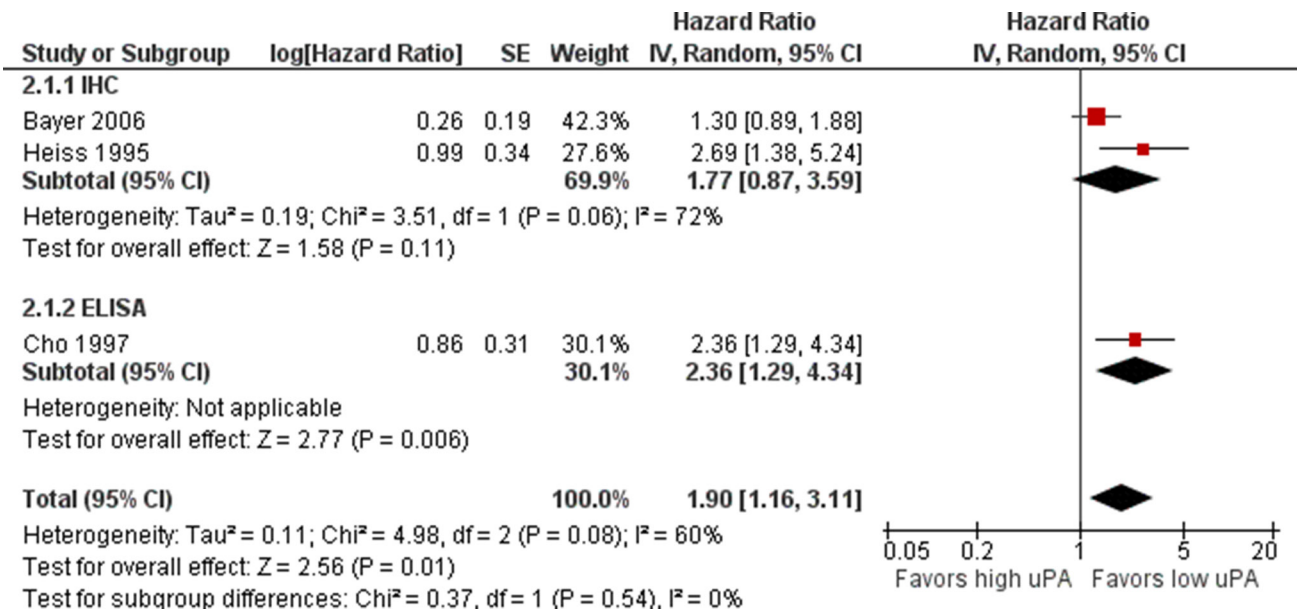

Supplementary Figure 2: Pooled estimate of hazard ratio (HR) for uPA expression and recurrence free survival (RFS).

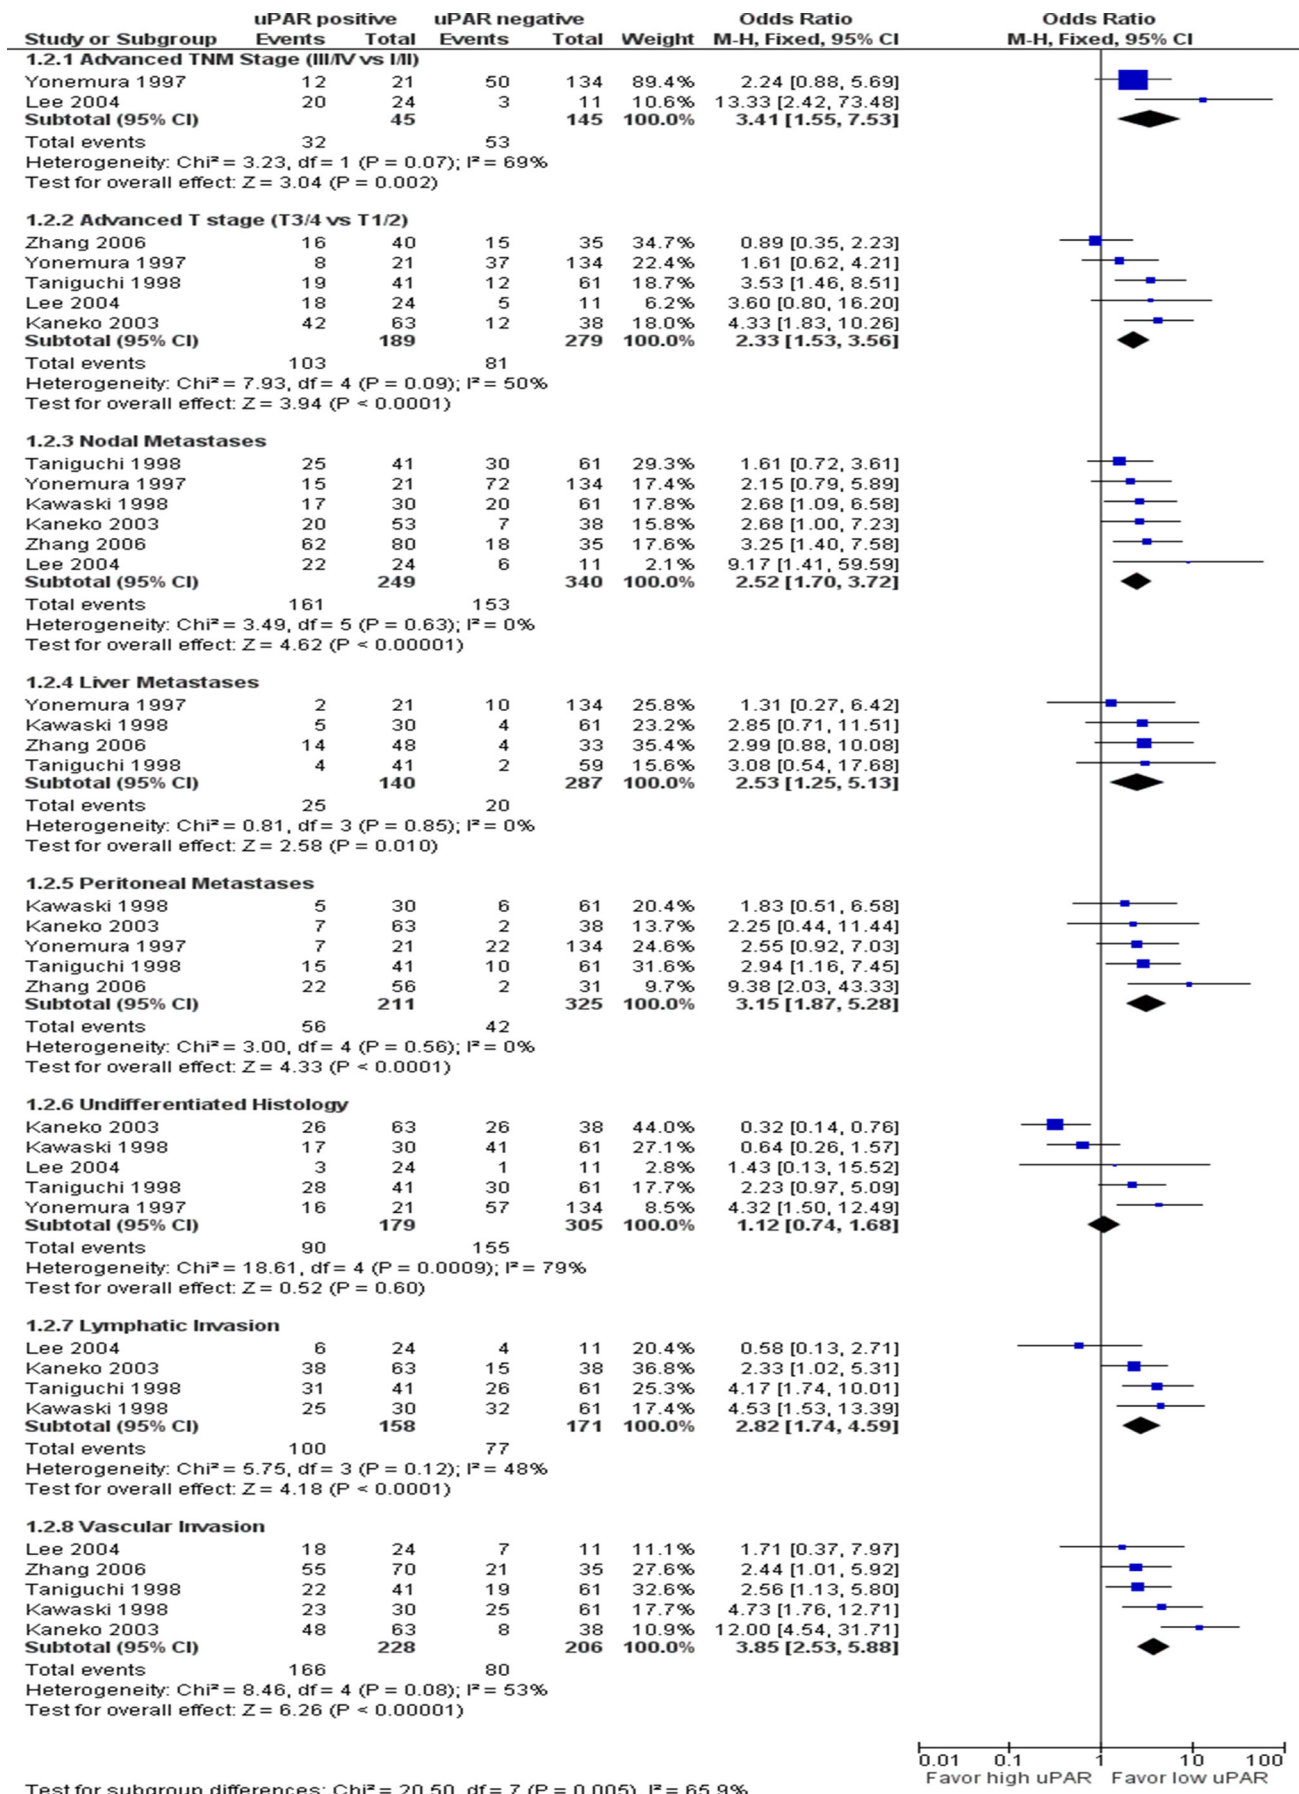

Supplementary Figure 3: Pooled estimate of odds ratio (OR) for uPAR expression and clinicopathological factors.

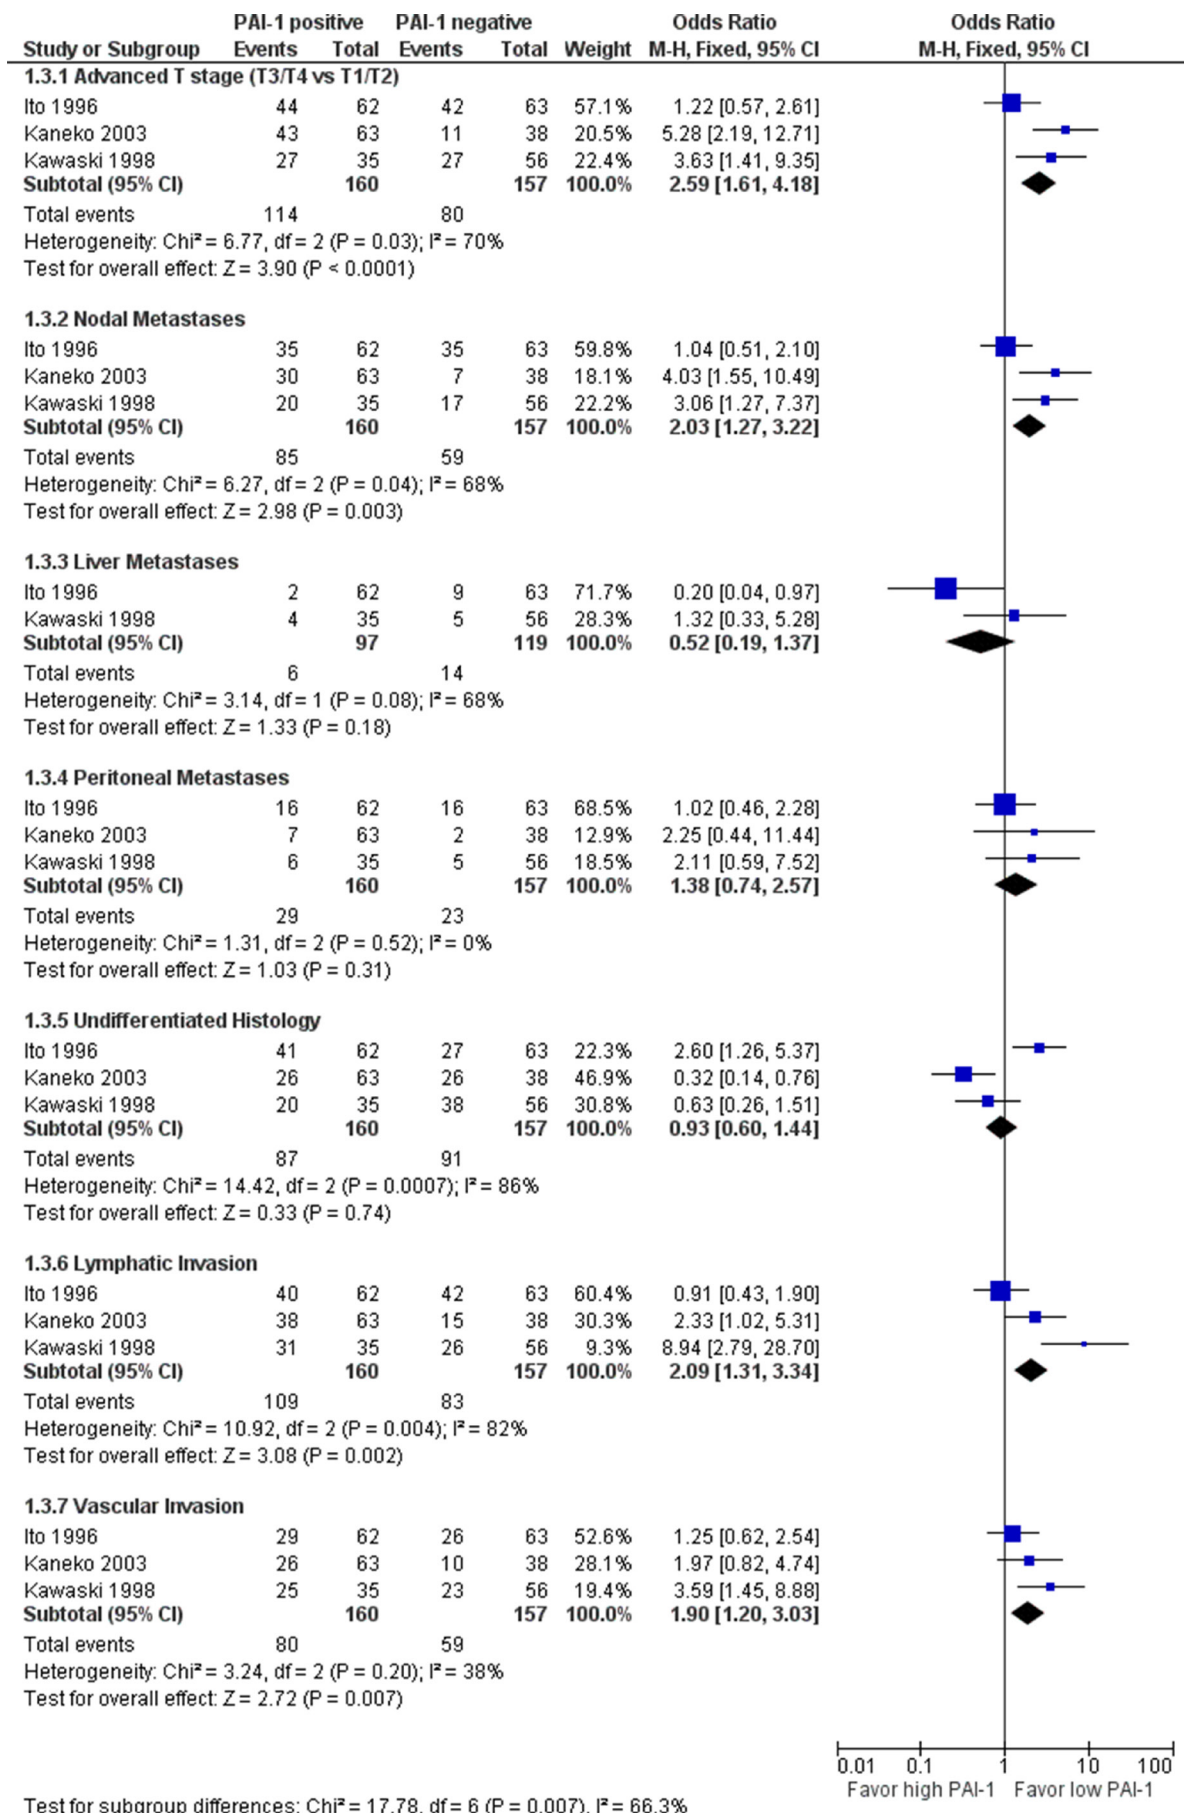

Supplementary Figure 4: Pooled estimate of odds ratio (OR) for PAI-1 expression and clinicopathological factors.

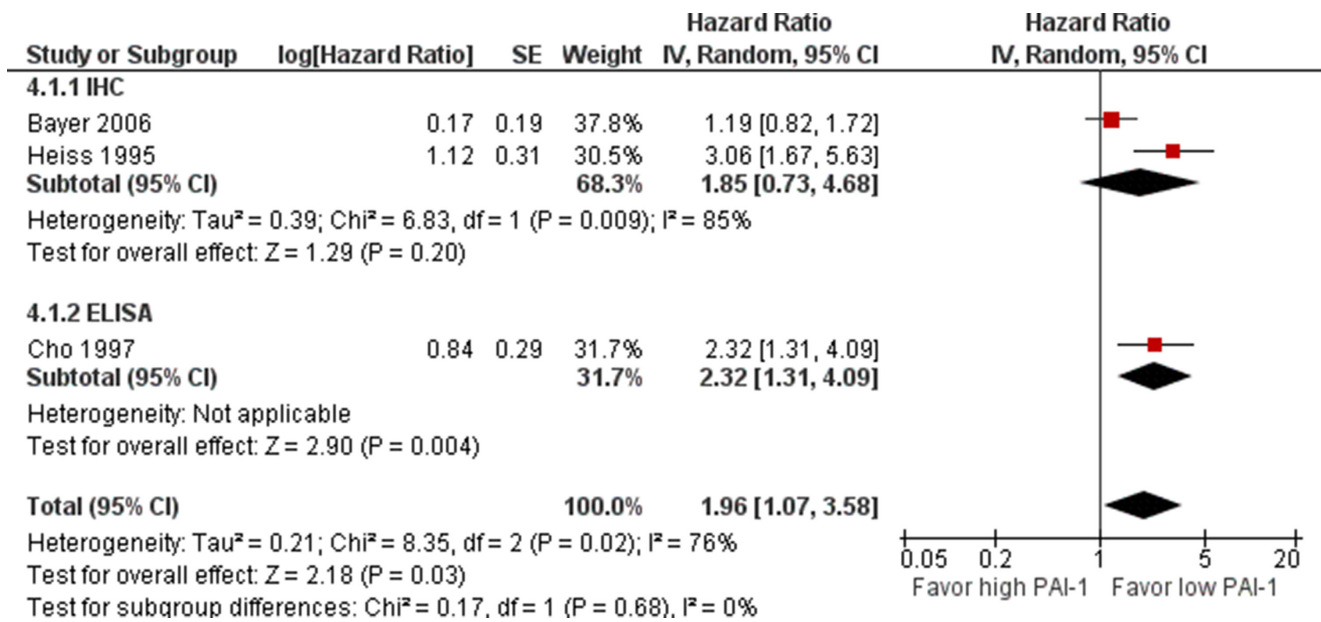

Supplementary Figure 5: Pooled estimate of hazard ratio (HR) for PAI-1 expression and recurrence free survival (RFS).

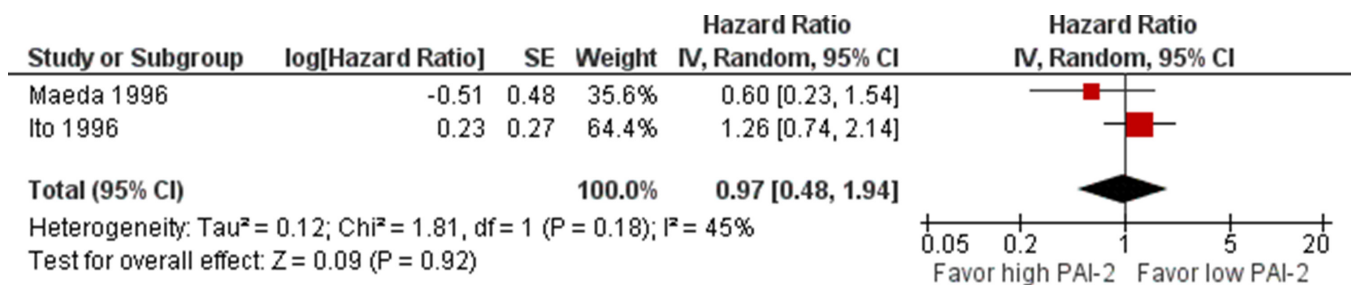

Supplementary Figure 6: Pooled estimate of hazard ratio (HR) for PAI-2 expression and overall survival (OS).

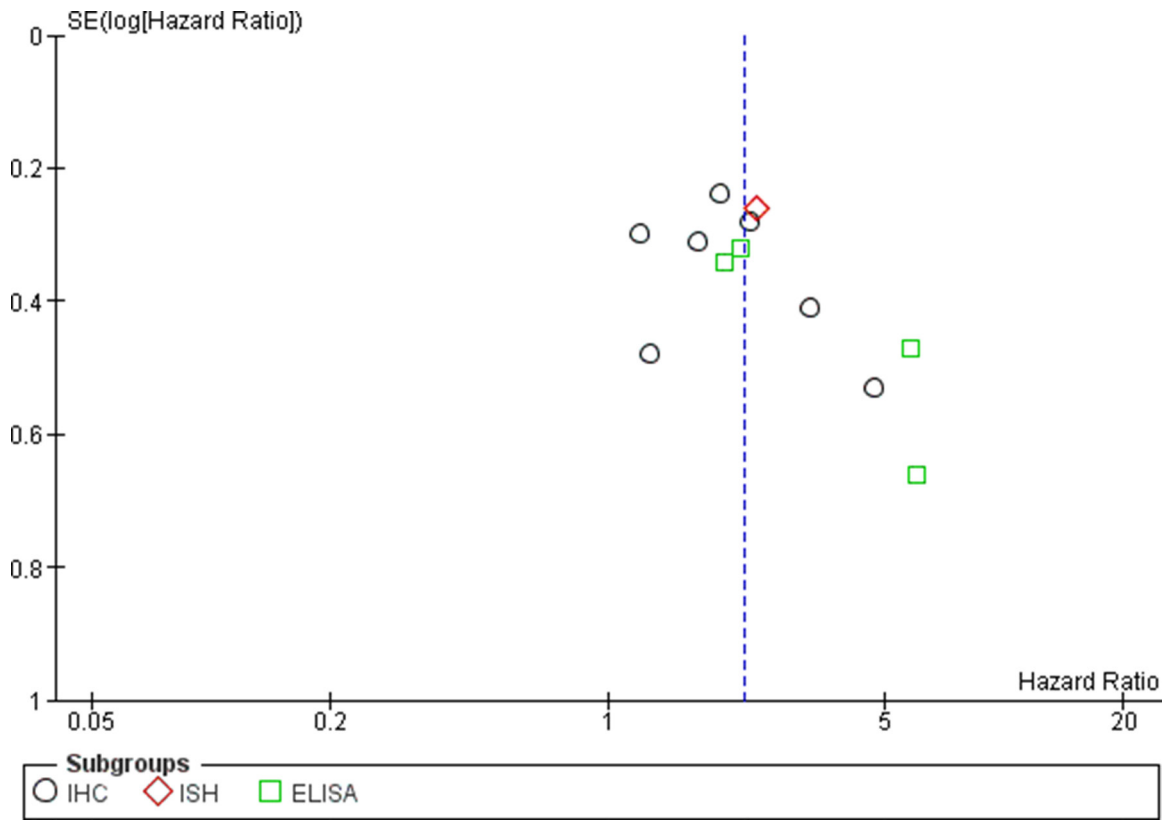

Supplementary Figure 7: Funnel plot of uPA studies.



**Supplementary Table 1: Characteristics of included studies**

|    | Study (year)                         | Pt No. | Primary location (TNM stage)     | Analysis Method | uPA component | Expression Rate (%) |
|----|--------------------------------------|--------|----------------------------------|-----------------|---------------|---------------------|
| 1  | Allott (2012) <sup>30</sup>          | 39     | Oesophageal (ND)                 | RT-PCR          | PAI-1         | 50                  |
| 2  | Alpizar Alpizar (2012) <sup>11</sup> | 95     | Gastric (I–IV)                   | IHC             | uPAR          | 90                  |
| 3  | Beyer (2006) <sup>22</sup>           | 104    | Gastric (I–IV)                   | IHC             | uPA           | 91                  |
|    |                                      |        |                                  |                 | uPAR          | 88                  |
|    |                                      |        |                                  |                 | PAI-1         | 90                  |
| 4  | Cho (1997) <sup>27</sup>             | 160    | Gastric (I–IV)                   | ELISA           | uPA           | 28                  |
|    |                                      |        |                                  |                 | PAI-1         | 33                  |
| 5  | Ganesh (1996) <sup>29</sup>          | 50     | Gastric (I–IV)                   | ELISA           | uPAR          | 42                  |
|    |                                      |        |                                  |                 | PAI-1         | 11                  |
| 6  | Heiss (1995) <sup>42</sup>           | 203    | Gastric (I–IV)                   | IHC             | uPA           | 75                  |
|    |                                      |        |                                  |                 | uPAR          | 69                  |
|    |                                      |        |                                  |                 | PAI-1         | 71                  |
| 7  | Ito (1996) <sup>31</sup>             | 125    | Gastric (ND)                     | IHC             | uPA           | 66                  |
|    |                                      |        |                                  |                 | PAI-1         | 50                  |
|    |                                      |        |                                  |                 | PAI-2         | 52                  |
| 8  | Kaneko (2003) <sup>32</sup>          | 101    | Gastric (ND)                     | IHC             | uPA           | 23                  |
|    |                                      |        |                                  |                 | uPAR          | 33                  |
|    |                                      |        |                                  |                 | PAI-1         | 37                  |
| 9  | Kawasaki (1998) <sup>12</sup>        | 91     | Gastric (I – IV)                 | IHC             | uPAR          | 33 (IHC)            |
|    |                                      |        |                                  | ISH             |               | 20 (ISH)            |
|    |                                      |        |                                  |                 | PAI-1         | 39 (IHC)            |
|    |                                      |        |                                  |                 |               | 29 (ISH)            |
| 10 | Lærum (2012) <sup>7</sup>            | 66     | Oesophageal, GOJ, Gastric (I–IV) | IHC             | uPAR          | 90*                 |
| 11 | Lee (2004) <sup>33</sup>             | 35     | Gastric (I–IV)                   | RT-PCR          | uPAR          | 63                  |
| 12 | Luebke (2006) <sup>41</sup>          | 105    | Gastric (I–IV)                   | IHC             | uPA           | 84                  |
|    |                                      |        |                                  |                 | PAI-1         | 93                  |
| 13 | Maeda (1996) <sup>47</sup>           | 120    | Gastric (I – IV)                 | IHC             | uPA           | 61                  |
|    |                                      |        |                                  |                 | PAI-2         | 63                  |
| 14 | Murata (1998) <sup>35</sup>          | 26     | Gastric (IV)                     | IHC             | uPA           | 42                  |
| 15 | Nekarda (1994) <sup>48</sup>         | 76     | Gastric (I – IV)                 | ELISA           | uPA           | 51                  |
|    |                                      |        |                                  |                 | PAI-1         | 41                  |
| 16 | Nekarda (1998) <sup>28</sup>         | 38     | Oesophageal (I-IV)               | ELISA           | uPA           | 34                  |
|    |                                      |        |                                  |                 | PAI-1         | 32                  |
| 17 | Okusa (1999) <sup>36</sup>           | 71     | Gastric (I–IV)                   | ELISA           | uPA           | 50                  |
| 18 | Plebani (1997) <sup>37</sup>         | 20     | Gastric (I–IV)                   | ELISA           | uPA           | 65                  |
|    |                                      |        |                                  |                 | uPAR          | 65                  |
|    |                                      |        |                                  |                 | PAI-1         | 75                  |
| 19 | Sakakibara (2006) <sup>38</sup>      | 79     | Gastric (I–IV)                   | RT-PCR          | PAI-1         | 58                  |
| 20 | Taniguchi (1998) <sup>39</sup>       | 102    | Gastric (ND)                     | IHC             | uPAR          | 40                  |
| 21 | Yonemura (1997) <sup>13</sup>        | 155    | Gastric (I–IV)                   | IHC             | uPAR          | 14                  |
| 22 | Zhang (2006) <sup>40</sup>           | 105    | Gastric (ND)                     | ISH             | uPA           | 58                  |
|    |                                      |        |                                  |                 | uPAR          | 67                  |

Pt No – number of patients; uPA – urokinase plasminogen activator; uPAR - urokinase plasminogen activator receptor; PAI-1 – plasminogen activator receptor 1; PAI-2 - plasminogen activator receptor 2; IHC – immunohistochemistry, RT-PCT - reverse transcription polymerase chain reaction; ISH – in-situ hybridisation; ELISA - enzyme-linked immunosorbent assay; GOJ – gastro-oesophageal junction.

\*expression at invasive front
